# Supplementary material for: Regulation of T cell afferent lymphatic migration by targeting LTβR-mediated non-classical NFκB signaling
Source: PubMed Central journal article supplement (PMC6070541; doi:10.1038/s41467-018-05412-0), 2018-08-01
Supplement: 41467_2018_5412_MOESM1_ESM.pdf [file 41467_2018_5412_MOESM1_ESM.pdf]

**Supplementary Information**

**Regulation of T cell afferent lymphatic migration by targeting LT $\beta$ R-mediated non-classical NF $\kappa$ B signaling**

**Piao et al.**

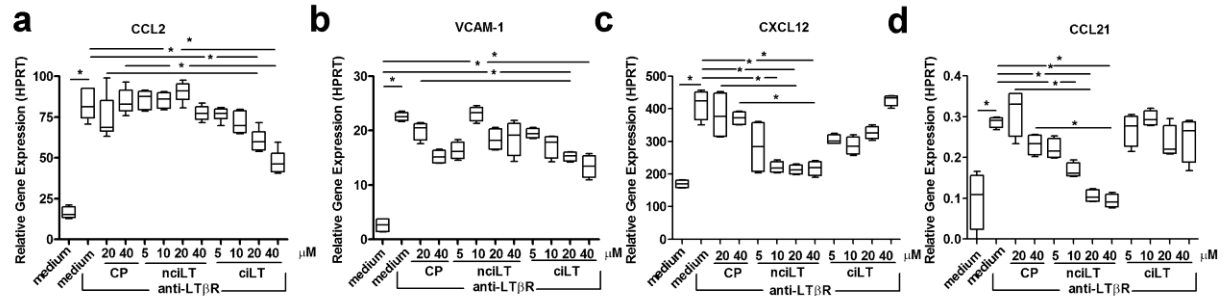

**Supplementary Figure 1.** Dose-response for *nciLT* and *ciLT*. qRT-PCR of LT $\beta$ R-induced CCL2 (a), VCAM-1 (b), CXCL12 (c), and CCL21 (d) in SVEC4-10 treated with various concentrations (5-40  $\mu\text{M}$ ) of peptides. Cells lysed for total RNA extraction after 3-hour stimulation with 2  $\mu\text{g}/\text{mL}$  anti-LT $\beta$ R crosslinked with 2  $\mu\text{g}/\text{mL}$  mouse anti-rat IgG1. Mean  $\pm$  SEM of 2 independent experiments. \* $p < 0.05$  by one-way ANOVA.

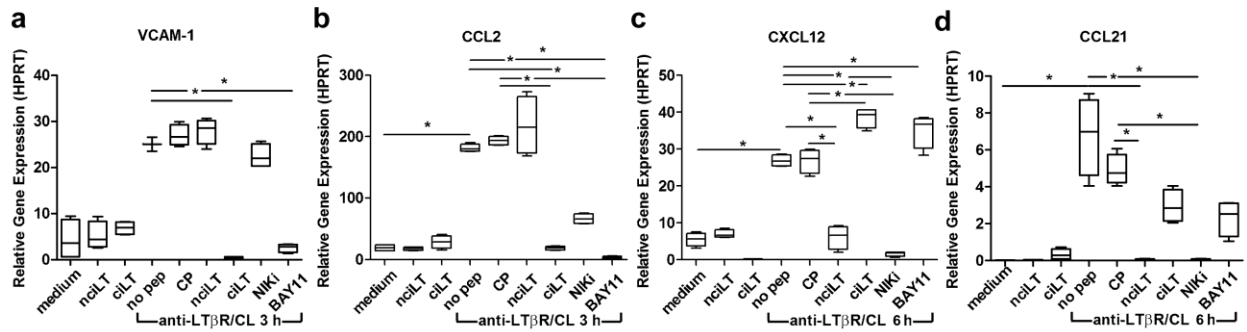

**Supplementary Figure 2.** *Classical and non-classical inhibitors differentially affect gene expression.* qRT-PCR of LT $\beta$ R-induced VCAM-1 (a), CCL2(b), CXCL12 (c), and CCL21(d) in SVEC4-10 treated with indicated peptides (20  $\mu$ M), NIKi (50  $\mu$ M), or BAY11 (25  $\mu$ M) and stimulated with 2  $\mu$ g/mL anti-LT $\beta$ R crosslinked with mouse anti-rat IgG1 (2  $\mu$ g/mL). Mean  $\pm$  SEM of 2 independent experiments. \* $p$  < 0.05 by one-way ANOVA.

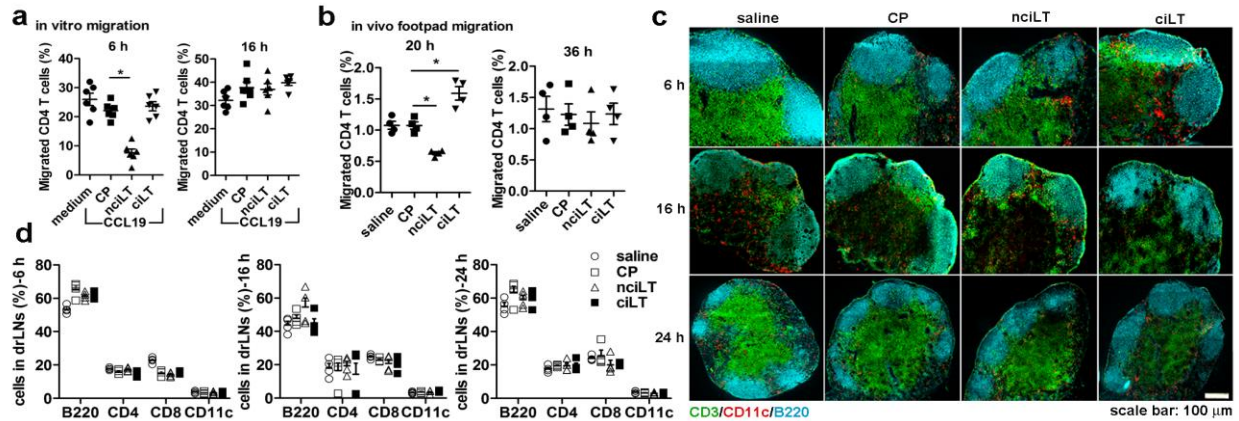

**Supplementary Figure 3.** Kinetics of persistence of peptide effects *in vitro* and *in vivo*, and effects of peptide on draining LN architecture and cell content. **(a)** LEC cell layers on inverted Boyden chamber treated with indicated peptides (20  $\mu$ M) for 30 min, washed, and after 6 or 16 hours  $2 \times 10^5$  purified naïve CD4 T cells loaded into the chamber and allowed to migrate for 3 hours toward 100 ng/mL CCL19. **(b)** Each hind footpad treated with 5 nmol of indicated peptides, after 20 or 36 hours,  $1 \times 10^6$  CFSE-labelled naïve CD4 T cells injected into hind footpads. Local popliteal LNs collected and analyzed with flow cytometry 16 hours after cell transfer. **(c)** 5 nmol of indicated peptide injected into hind footpads. After 6, 16, and 24 hours, popliteal LNs collected and analyzed for T cell (CD3, CD4, and CD8), B cell (B220), and DC (CD11c) distribution by immunohistochemistry **(c)** and flow cytometry **(d)**. Magnification 20x; scale bar 100  $\mu$ m. Mean  $\pm$  SEM of 2 independent experiments. \* $p < 0.05$  by one-way ANOVA **(a** and **b)**.

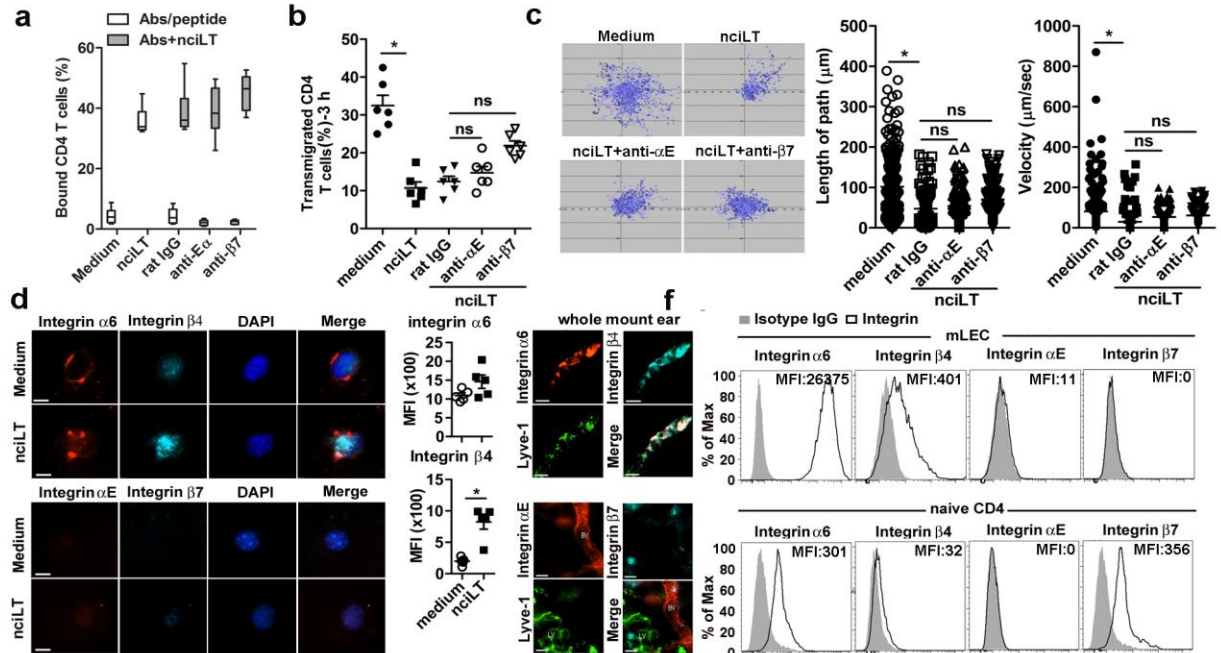

**Supplementary Figure 4.** LEC and lymphatic vessels express integrins  $\alpha$ 6 and  $\beta$ 4. (a) Binding of naïve CD4 T cells to LEC pretreated with nciLT (20  $\mu$ M) with (filled bars) or without anti-integrin mAbs (white bars) (2  $\mu$ g/ml) for 30 minutes at 37°C. (b and c) LEC layers treated as in a; naïve CD4 T cells migrated across LEC toward CCL19. Migrated cells in lower chamber counted (b) or monitored for 3 hours of live imaging for track length (left) and velocity (right) (c). (d) Immunohistochemistry of integrins on primary LEC pretreated with or without nciLT (20  $\mu$ M) for 30 min. Magnification 60x; scale bar 10  $\mu$ m. (e) Whole mount staining of wild type C57BL/6 ear pinnae for the indicated integrins. BV, blood vessel; LV, lymphatic vessel. Magnification 20x; scale bar 100  $\mu$ m. (f) Flow cytometric analysis of integrin expression on primary LEC and purified naïve CD4 T cells. MFIs of positive cells shown. Data representative of 3 independent experiments. \*p < 0.05 by one-way ANOVA (a-d).

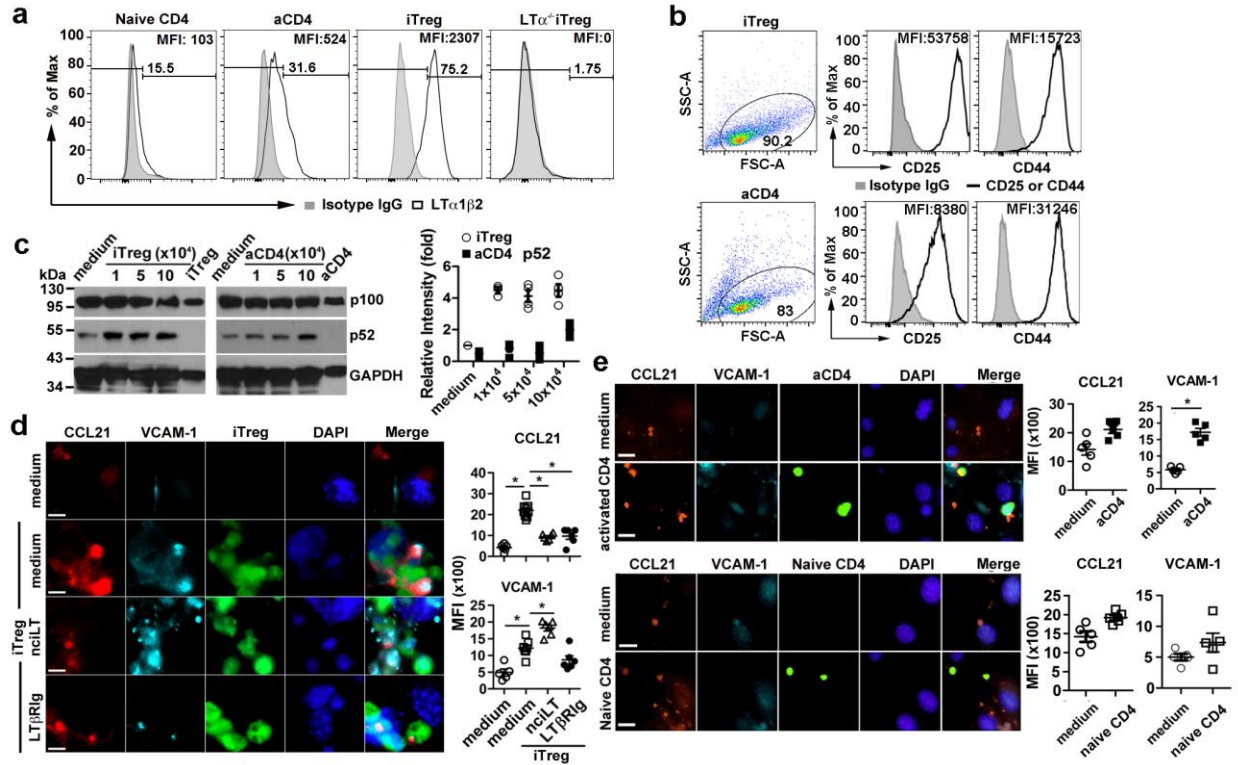

**Supplementary Figure 5.** *T* lymphocytes engage  $LT\alpha\beta$ - $LT\beta R$  NIK pathway and activate cell adhesion molecules and homing chemokines in LEC. **(a and b)** Flow cytometric analysis for  $LT\alpha1\beta2$  expression on naïve CD4, activated CD4 (aCD4), iTreg, or  $LT\alpha$ -deficient iTreg **(a)** and cell activation markers (CD25, CD44) on iTreg and aCD4 **(b)**. Gating shows percent positive cells **(a)** or live cells **(b)** and MFI of positive cells. **(c)** Immunoblot of p100 to p52 conversion in LEC incubated with various numbers of purified iTreg or activated CD4 T cells for 6 hours. **(d-f)** Immunohistochemistry of VCAM-1 and CCL21 in primary LEC were pretreated with nciLT (20  $\mu$ M) or  $LT\beta R$ Ig (2 mg/mL) for 30 min at 37°C in 8-well slide chamber, and co-cultured with  $2 \times 10^5$  CFSE labeled iTreg **(d)**, activated CD4 T cells **(e)**, or naïve CD4 T cells **(f)** for 6 hours. Magnification 60x; scale bar 5  $\mu$ m. \* $p < 0.05$  by one-way ANOVA **(c, d)** or by Student's t test **(e, f)**.



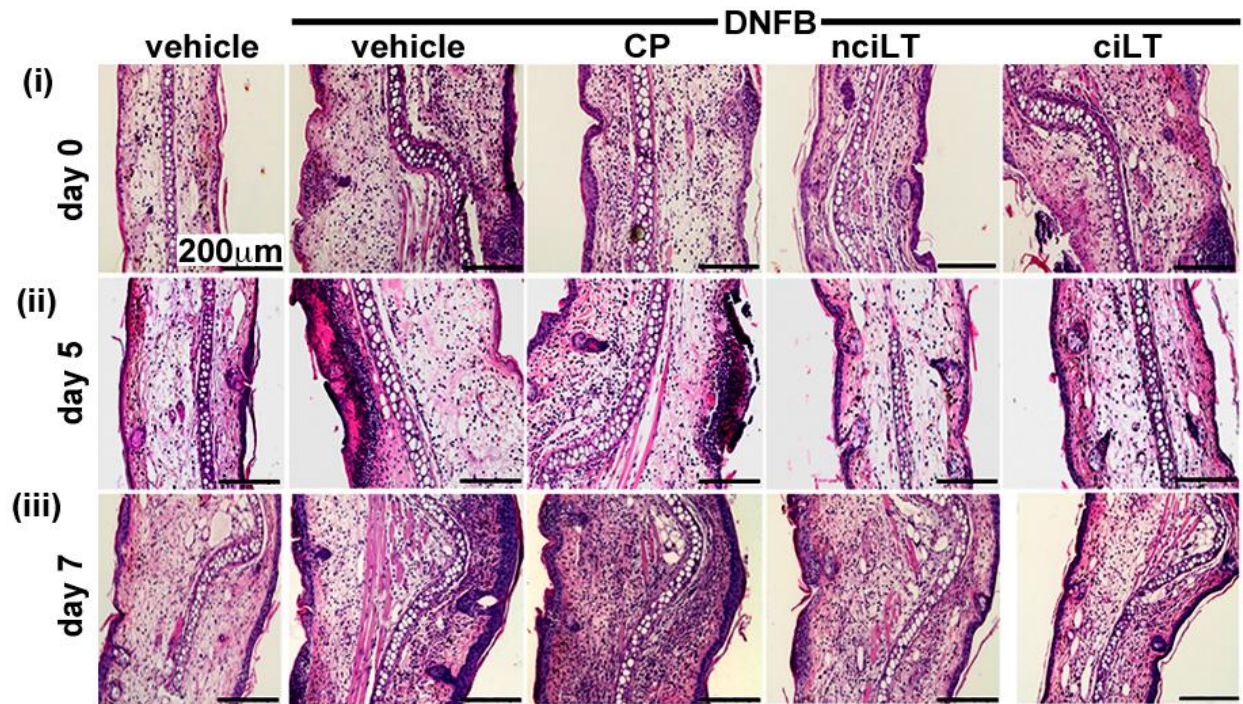

**Supplementary Figure 6.** *Histologic analysis of CHS.* H&E images of ear pinnae CHS responses of the indicated groups, treatments and times. Representative of three independent experiments with 3 mice/group for each experiment. Magnification 20x, scale bar 200 μm.

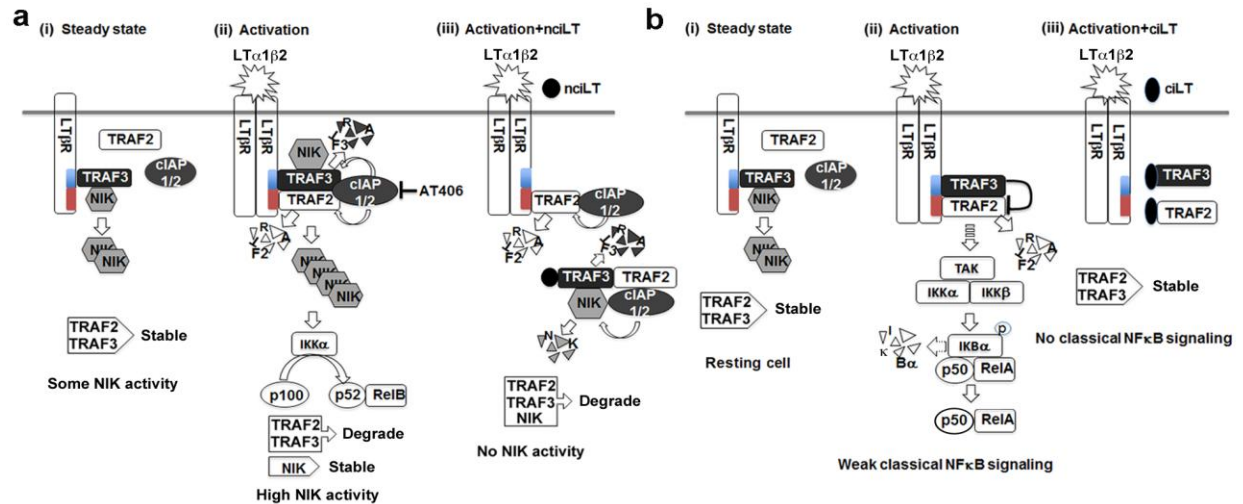

**Supplementary Figure 7. Proposed model of TRAF regulation by the blocking peptides in  $LT\beta R$ -mediated  $NF\kappa B$  pathways.** (a) Non-classical NIK pathway predominates in LEC. (i) In steady state, TRAF3 constitutively binds  $LT\beta R$  and is stabilized from degradation (Fig. 3b, 3c). (ii)  $LT\beta R$  activation recruits TRAF2 and cIAP1/2, which together with TRAF3 and NIK form a signal complex; both TRAF2 and TRAF3 are degraded by ubiquitination by cIAP1/2, leading to release of NIK from the complex. NIK activates  $IKK\alpha$  which converts p100 to p52 (Fig. 1f). (iii) nciLT sequesters TRAF3 but not TRAF2 from the activated receptor, causing TRAF2 and TRAF3 degradation and preventing NIK activation (Fig. 3b, 3c) and blocking RelB nuclear translocation (Fig. 3g). (b) (i) In steady state, the classical pathway is not activated by  $LT\beta R$  (Fig. 1c, 1d, 3d, 3e). (ii) With  $LT\beta R$  activation, TRAF2 recruits and activates TGF $\beta$  activating kinase 1 (TAK1) and the  $LT\beta R$ -classical  $NF\kappa B$  pathway. TAK1 activates  $IKK\alpha$  and  $IKK\beta$ , which phosphorylate and degrade  $I\kappa B\alpha$  to release p50 and RelA into the nucleus (Fig. 1d, 1e, 3e). (iii) ciLT sequesters both TRAF2 and TRAF3 from  $LT\beta R$  (Fig. 3b), and stabilizes TRAF3 and inhibits TRAF2 activation to block RelA nuclear translocation (Fig. 3c, 3e).



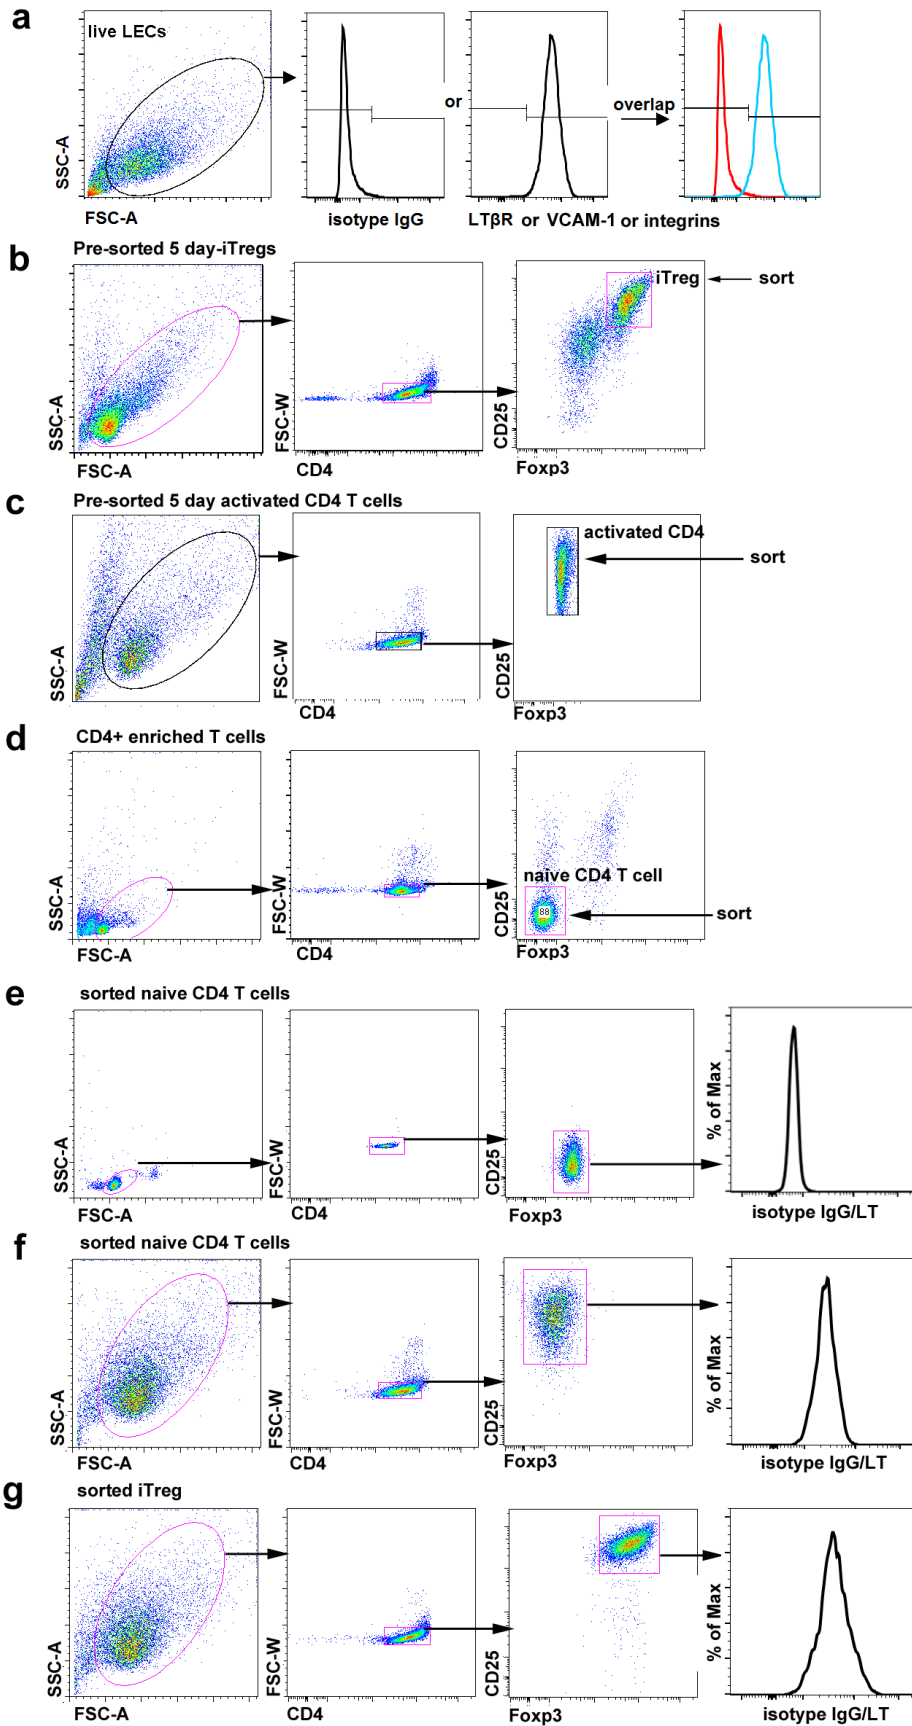

**Supplementary Figure 8.** *Gating strategies used for flow cytometry analysis or for cell sorting.*

(a) Gating strategy to determine the percentage of LT $\beta$ R, VCAM-1, or integrin expression on SVEC4-10 or mLEC in Fig. 1a (LT $\beta$ R), 2b (VCAM-1), and S4f (integrins in mLEC or purified nCD4). (b-d) Gating strategy to sort Treg (CD4+CD25+Foxp3+), activated CD4 T (CD4+CD25+Foxp3-), and naïve CD4 T (CD4+CD25-Foxp3-) cells from Foxp3 reporter mice used on the in vitro migration assay presented in Fig. 5a, e-f or used in co-culture with LEC for immunoblot assay in Fig. 6i, j. (e-g) Gating strategy to determine the percentage of LT $\alpha$ 1 $\beta$ 2 expression on T cells presented in Fig. S5a. The same strategy was used for CD25 and CD44 expression on iTreg and aCD4 in Fig.S5b.

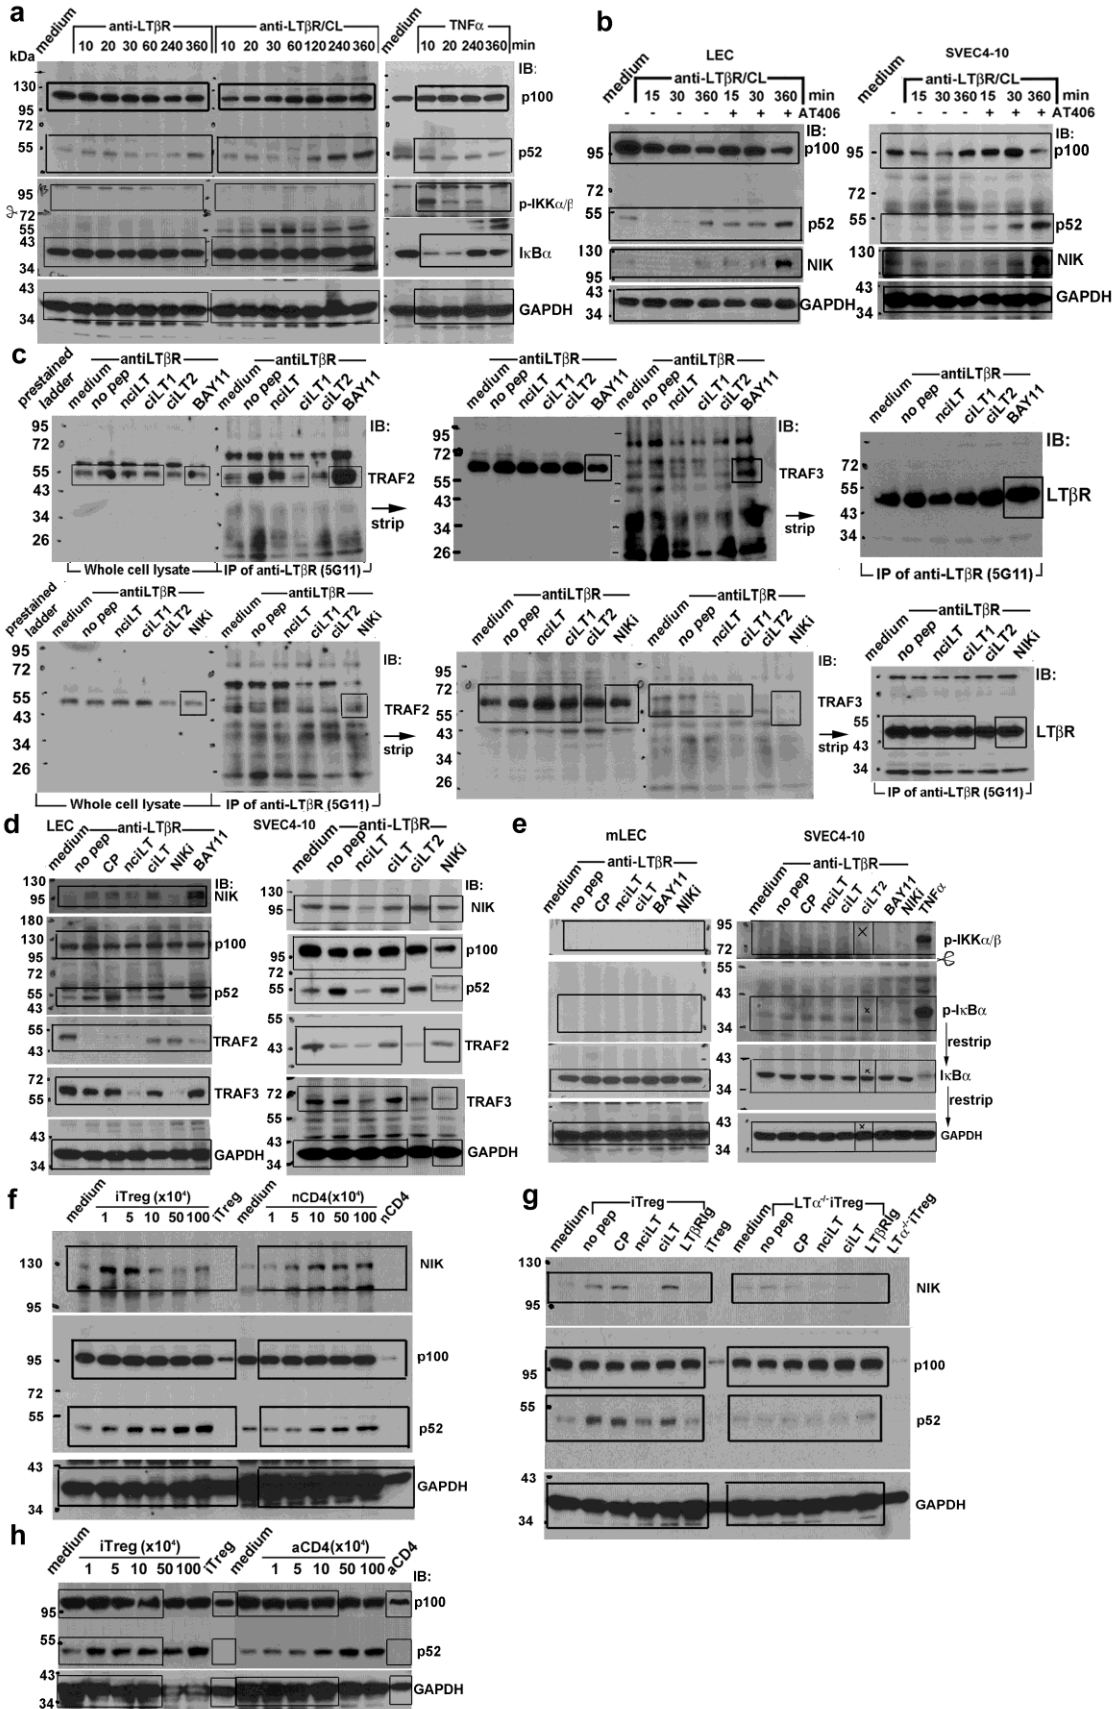

**Supplementary Figure 9.** Original Immunoblots. **(a)** Immunoblots corresponding to Fig. 1c. **(b)** Immunoblots corresponding to Fig. 1f. **(c)** Immunoblots corresponding to Fig. 3b. **(d)** Immunoblots corresponding to Fig. 3c. **(e)** Immunoblots corresponding to Fig. 3d. **(f)** Immunoblots corresponding to Fig. 6i. **(g)** Immunoblots corresponding to Fig. 6j. **(h)** Immunoblots corresponding to Fig. S5c.
